# Supplementary material
Source: publisher site journal article supplement (https://www.dovepress.com/article/349836)
Supplement: Supplementary file 1 [file get_supplementary_file.php]

# Supplement A. Search Strategies

Supplement A1. Summary of Search Strategy Across all Databases

| **Database** | **Medline** | **Cochrane CENTRAL** | **Campbell Collaboration** | **SSCI** | **TRoPHI** |
| --- | --- | --- | --- | --- | --- |
| **Description** | Database covers all aspects of clinical medicine, biomedicine, nursing, dentistry, allied health, health policy, genetics etc. | The Cochrane Central Register of Controlled Trials (CENTRAL) is a highly concentrated source of reports of randomized and quasi-randomized controlled trials. | Contains systematic reviews on the effects of interventions in the fields of education, crime and justice, and social policy. | Social Sciences Citation Index (SSCI) contains citations, author abstracts and cited references from over 1,700 scholarly social sciences journals. | The Trials Register of Promoting Health Interventions (TRoPHI) is unique in its focus on the coverage of trials of interventions in health promotion and public health worldwide. It covers both randomized and non-randomized controlled trials. |
| **Platform** | OVID | Cochrane Library | Campbell Collaboration | Web of Science | EPPI-Centre |
| **Search Last Updated** | May 10, 2021 | May 10, 2021 | May 10, 2021 | May 18, 2021 | May 17, 2021 |
| **Database Timespan** | 1946 to May 07, 2021 | No inception date | Unclear | 1956-present | August 2004 - present |
| **Number of Citations** | 2,951 | 25 | 2 reviews  (Hand searched) | 2,080 | 136 |
| **Total Citations from Databases** | 5,192 (excludes 2 reviews) | | | | |
| **Total Citations** | 5,192 (Databases) + 6 (Hand-searches – see Table 1) | | | | |

Supplement A2. Grey literature: government and non-profit organizations hand-searches

| **Organization** | **Website** |
| --- | --- |
| Administration for Community Living (United States Department of Health and Human Services) | <https://acl.gov/> |
| The Care Policy and Evaluation Centre (CPEC) An international research centre working mainly in the areas of long-term care (social care), mental health, developmental disabilities and other health issues. | <https://www.lse.ac.uk/cpec/research> |
| Government of Canada (Programs and services for seniors and National Seniors Council) | <https://www.canada.ca/en/employment-social-development/campaigns/seniors.html?utm_campaign=not-applicable&utm_medium=vanity-url&utm_source=canada-ca_seniors>  <https://www.canada.ca/en/national-seniors-council/programs/publications-reports.html#h2.01> |
| HelpAge International | <https://www.helpage.org/what-we-do/health/> |
| The International Federation on Ageing (IFA) | <https://ifa.ngo/positions/addressing-inequalities/> |
| World Health Organization (WHO) Social Determinants of Health | <https://www.who.int/health-topics/social-determinants-of-health#tab=tab_2> |

Supplement A3. Search strategy: exclusion criteria, PICOT format

|  | **Criteria** | **Examples (reference)** |
| --- | --- | --- |
| Exclusion Criteria | | |
| Intervention (I) | (a) The intervention was disease specific.  (b) The intervention included social workers or case managers as treatment, but was only a small part of the overall intervention.  (c) Intervention was a psychological intervention.  (d) The intervention focused only on physical exercise or falls.  (e) The intervention was primary healthcare based.  (f) Government policy (programs written into legislation or regulation) influencing social circumstances rather than an intervention.  (e) No intervention, but general models of care. | (a) Efficacy of a community-based physical activity program for stroke and heart attack prevention among senior hypertensive patients (Gong, Chen, and Li 2015)  (b) REACH and REACH-II trials (Belle 2006; Nichols et al. 2017)    (c) A positive psychological intervention for lonely people with health problems and low socioeconomic status (Weiss et al. 2020)  (d) Home versus center based physical activity programs in older adults (Ashworth et al. 2005)  (e) Proactive primary care model for frail older people in New Zealand delays aged-residential care: A quasi-experiment (Robinson et al. 2021)  (f) Impact of a guaranteed annual income program (Old Age Security) on seniors’ physical, mental and functional health (McIntyre et al. 2016)  (e) Naturally occurring retirement communities or village models (Cohen-Mansfield, Dakheel-Ali, and Frank 2010; Graham, Scharlach, and Price Wolf 2014) |
| Outcome (O) | Studies evaluated outcomes in program volunteers or caregivers rather than program recipients.  The outcome was physical activity. | Senior Companion Program where the psychosocial benefits were measured in older adult women volunteers (Hood et al. 2018)  Impact of a senior fitness program on measures of physical and emotion health and functioning (Hamar et al. 2013) |
| Study Type (T) | Many of the interventions were reported in more than one citation. The publication with the outcomes of interest was defined as the main paper, but data could be extracted from other papers as well. |  |

Supplement A3. Unedited & Exported Database Search Strategies

**DATABASE:** Ovid MEDLINE(R) ALL <1946 to May 07, 2021>

Search Strategy:

*Note: Medline search line 1 is a geriatric search filter from Campbell S. Filter to Retrieve Studies Related to Geriatrics from the Ovid MEDLINE Database. [Internet]. John W. Scott Health Sciences Library, University of Alberta; 2021. Available from: <https://docs.google.com/document/d/1cawy4Zx8v_FyFBPBM7PGGAb8P5_ZAgegIlA6-zSi_mI/edit>

--------------------------------------------------------------------------------

1 **exp Geriatrics/ or exp Aged/ or Health Services for the Aged/ or Senior Centers/ or (elders or elderly or geriatric* or "gerontolog* old age" or (seniors not "high school") or (older adj3 (adult*or person* or people or man or men or woman or women)) or centenarian* or nonagenarian* or octogenarian* or septuagenarian* or sexagenarian* or dottering or decrepit or tottering or overaged or "oldest old" or supercentenarian*).mp**. (3368072)

2 ((home* or in-home* or at-home* or home-based or domiciled* or communit* or community-based or population-based or neighbo?rhood* or primary-care or Senior) adj3 (visit* or support* or program* or intervention* or outreach* or Center* or Centre*)).tw,kf. (97765)

3 adult day care centers/ or community health nursing/ or community mental health services/ or community networks/ or community participation/ or home care services/ or occupational health services/ or exp senior centers/ (102086)

4 exp Case Management/ (10244)

5 2 or 3 or 4 (196449)

6 (employment or employ* training or unemployment or food security or food insecurity or poverty or income or (income adj1 (supplement* or maintenance)) or welfare or social assistance).tw,kf. (265133)

7 exp Socioeconomic Factors/ or exp Sociological Factors/ (840621)

8 Food Security/ or Health literacy/ or Residence Characteristics/ or Environment Design/ or Built Environment/ (47587)

9 (social* adj1 (capital or participation or interaction or support* or marginali?ation or integration or activit* or invest* or vulnerabl*)).tw,kf. (74006)

10 6 or 7 or 8 or 9 (1061182)

11 Mortality/ or death/ or Frailty/ or Activities of Daily Living/ or Neurocognitive Disorders/ or "Quality of Life"/ or Memory disorders/ or cognition/ (455233)

12 ((cognit* or neurocognit* or memory or neuropsy* or neuro*) adj (impair* or disorder* or dysfunction* or function* ag?ing or declin* or status or perform* or disabil* or disable* or maint* or enhanc*)).tw,kf. (287551)

13 (dement* or alzheimer* or (chronic adj2 cerebrovascular) or memory or cognition).tw,kf. (524659)

14 (quality-of-life or qol or hql or h-qol or hr-qol or wellbeing).tw,kf. (325862)

15 (mortality or death or surviv*).tw,kf. (2375542)

16 (independ* or function* or disability or morbidity or ADL or frailty or frail* or depend*).tw,kf. (6856388)

17 (((hospital* or emergency) adj2 (admission* or visit*)) or hospitali?ation).tw,kf. (214808)

18 11 or 12 or 13 or 14 or 15 or 16 or 17 (8998607)

19 1 and 5 and 10 and 18 (5614)

20 limit 19 to english language (5140)

21 limit 20 to yr="2010 -Current" (2951)

**DATABASE:** Cochrane CENTRAL

Date: May 10, 2021

Issue 4 of 12, April 2021

1. MeSH descriptor: [Social Determinants of Health] explode all trees

2. MeSH descriptor: [Sociological Factors] explode all trees

3. MeSH descriptor: [Geriatrics] explode all trees

4. (1 or 2) and 3 (29)

5. limit to 2010 (25)

**DATABASE:** CAMPBELL COLLABORATION

Date: May 11, 2021

1. Social Welfare coordinating Group

2. Records Available in English

3. 1 & 2 (36)

4: Reviews hand searches (2)

- https://www.campbellcollaboration.org/better-evidence/older-volunteers-physical-mental-health.html
- https://www.campbellcollaboration.org/better-evidence/home-visits-for-prevention-of-impairment-death-older-adults.html

**DATABASE:** Social Sciences Citation Index (SSCI) --1956-present

Platform: Web of Science

Date: May 18, 2021

| # 20 | [**2,080**](https://apps.webofknowledge.com/summary.do?product=WOS&doc=1&qid=65&SID=6A4KgO66qeXdmhRFDb3&search_mode=AdvancedSearch&update_back2search_link_param=yes) | (#19) *AND***LANGUAGE:**  (English)  *Indexes=SSCI Timespan=2010-2021* |
| --- | --- | --- |
| # 19 | [**2,778**](https://apps.webofknowledge.com/summary.do?product=WOS&doc=1&qid=63&SID=6A4KgO66qeXdmhRFDb3&search_mode=CombineSearches&update_back2search_link_param=yes) | #18 AND #12 AND #8 AND #4  Indexes=SSCI Timespan=All years |
| # 18 | [**2,848,717**](https://apps.webofknowledge.com/summary.do?product=WOS&doc=1&qid=62&SID=6A4KgO66qeXdmhRFDb3&search_mode=CombineSearches&update_back2search_link_param=yes) | #17 OR #16 OR #15 OR #14 OR #13  Indexes=SSCI Timespan=All years |
| # 17 | [**45,025**](https://apps.webofknowledge.com/summary.do?product=WOS&doc=1&qid=61&SID=6A4KgO66qeXdmhRFDb3&search_mode=AdvancedSearch&update_back2search_link_param=yes) | (TS = ((((hospital* or emergency) NEAR/2 (admission* or visit*) ) or hospitali?ation)))  AND LANGUAGE:  (English)  Indexes=SSCI Timespan=All years |
| # 16 | [**1,121,136**](https://apps.webofknowledge.com/summary.do?product=WOS&doc=1&qid=60&SID=6A4KgO66qeXdmhRFDb3&search_mode=AdvancedSearch&update_back2search_link_param=yes) | (TS = (qol or hql or h-qol or hr-qol or wellbeing or survival or independ* or function* or disability or morbidity or ADL or frailty or frail* or depend*) )  AND LANGUAGE:  (English)  Indexes=SSCI Timespan=All years |
| # 15 | [**85,847**](https://apps.webofknowledge.com/summary.do?product=WOS&doc=1&qid=59&SID=6A4KgO66qeXdmhRFDb3&search_mode=AdvancedSearch&update_back2search_link_param=yes) | (TS = (dement* or alzheimer*) )  AND LANGUAGE:  (English)  Indexes=SSCI Timespan=All years |
| # 14 | [**1,542,149**](https://apps.webofknowledge.com/summary.do?product=WOS&doc=1&qid=58&SID=6A4KgO66qeXdmhRFDb3&search_mode=AdvancedSearch&update_back2search_link_param=yes) | (TS = (impair* or disorder* or dysfunction* or function* ag?ing or declin* or status or perform* or disabil* or disable*) )  AND LANGUAGE:  (English)  Indexes=SSCI Timespan=All years |
| # 13 | [**1,439,480**](https://apps.webofknowledge.com/summary.do?product=WOS&doc=1&qid=57&SID=6A4KgO66qeXdmhRFDb3&search_mode=AdvancedSearch&update_back2search_link_param=yes) | (TS = (Mortality or death or Frailty or "Activit* of Daily Living" or dementia* or "Quality of Life" or Memory or cognition or health) )  AND LANGUAGE:  (English)  Indexes=SSCI Timespan=All years |
| # 12 | [**544,812**](https://apps.webofknowledge.com/summary.do?product=WOS&doc=1&qid=56&SID=6A4KgO66qeXdmhRFDb3&search_mode=CombineSearches&update_back2search_link_param=yes) | #11 OR #10 OR #9  Indexes=SSCI Timespan=All years |
| # 11 | [**127,608**](https://apps.webofknowledge.com/summary.do?product=WOS&doc=1&qid=55&SID=6A4KgO66qeXdmhRFDb3&search_mode=AdvancedSearch&update_back2search_link_param=yes) | (TS = (social* NEAR/1 (capital or participation or interaction or support* or marginali?ation or integration or activit* or invest* or vulnerabl*) ))  AND LANGUAGE:  (English)  Indexes=SSCI Timespan=All years |
| # 10 | [**37,482**](https://apps.webofknowledge.com/summary.do?product=WOS&doc=1&qid=54&SID=6A4KgO66qeXdmhRFDb3&search_mode=AdvancedSearch&update_back2search_link_param=yes) | (TS = ("Socioeconomic Factor*" or "Sociological Factor*" or "social determinant" or "social factor" or "Food Security" or "Health literacy" or "Residence Characteristic*" or "Environment Design" or "Built Environment") )  AND LANGUAGE:  (English)  Indexes=SSCI Timespan=All years |
| # 9 | [**414,403**](https://apps.webofknowledge.com/summary.do?product=WOS&doc=1&qid=53&SID=6A4KgO66qeXdmhRFDb3&search_mode=AdvancedSearch&update_back2search_link_param=yes) | (TS = (employment or employ* training or unemployment or food security or food insecurity or poverty or income or (income NEAR/1 (supplement* or maintenance) ) or welfare or social assistance))  AND LANGUAGE:  (English)  Indexes=SSCI Timespan=All years |
| # 8 | [**78,758**](https://apps.webofknowledge.com/summary.do?product=WOS&doc=1&qid=52&SID=6A4KgO66qeXdmhRFDb3&search_mode=CombineSearches&update_back2search_link_param=yes) | #7 OR #6 OR #5  Indexes=SSCI Timespan=All years |
| # 7 | [**8,306**](https://apps.webofknowledge.com/summary.do?product=WOS&doc=1&qid=51&SID=6A4KgO66qeXdmhRFDb3&search_mode=AdvancedSearch&update_back2search_link_param=yes) | (TS = ("case management" or navigator) )  AND LANGUAGE:  (English)  Indexes=SSCI Timespan=All years |
| # 6 | [**12,206**](https://apps.webofknowledge.com/summary.do?product=WOS&doc=1&qid=50&SID=6A4KgO66qeXdmhRFDb3&search_mode=AdvancedSearch&update_back2search_link_param=yes) | (TS = ("adult day care center*" or "community health nursing" or "community network*" or "home care" or "senior center*") )  AND LANGUAGE:  (English)  Indexes=SSCI Timespan=All years |
| # 5 | [**62,209**](https://apps.webofknowledge.com/summary.do?product=WOS&doc=1&qid=49&SID=6A4KgO66qeXdmhRFDb3&search_mode=AdvancedSearch&update_back2search_link_param=yes) | (TS = ((home* or in-home* or at-home* or home-based or domiciled* or communit* or community-based or population-based or neighbo?rhood* or primary-care or Senior) NEAR/2 (visit* or support* or program* or intervention* or outreach* or Center* or Centre*) ))  AND LANGUAGE:  (English)  Indexes=SSCI Timespan=All years |
| # 4 | [**345,148**](https://apps.webofknowledge.com/summary.do?product=WOS&doc=1&qid=48&SID=6A4KgO66qeXdmhRFDb3&search_mode=CombineSearches&update_back2search_link_param=yes) | #3 OR #2 OR #1  Indexes=SSCI Timespan=All years |
| # 3 | [**155,069**](https://apps.webofknowledge.com/summary.do?product=WOS&doc=1&qid=47&SID=6A4KgO66qeXdmhRFDb3&search_mode=AdvancedSearch&update_back2search_link_param=yes) | (TS = (older NEAR/3 (adult* or person* or people or man or men or woman or women) ))  AND LANGUAGE:  (English)  Indexes=SSCI Timespan=All years |
| # 2 | [**24,577**](https://apps.webofknowledge.com/summary.do?product=WOS&doc=1&qid=46&SID=6A4KgO66qeXdmhRFDb3&search_mode=AdvancedSearch&update_back2search_link_param=yes) | (TS = (seniors not "high school") )  AND LANGUAGE:  (English)  Indexes=SSCI Timespan=All years |
| # 1 | [**274,612**](https://apps.webofknowledge.com/summary.do?product=WOS&doc=1&qid=44&SID=6A4KgO66qeXdmhRFDb3&search_mode=AdvancedSearch&update_back2search_link_param=yes) | (TS = (elders or elderly or geriatric* or gerontolog* or old age or centenarian* or nonagenarian* or octogenarian* or septuagenarian* or sexagenarian* or dottering or decrepit or tottering or overaged or "oldest old" or supercentenarian*) )  AND LANGUAGE:  (English)  Indexes=SSCI Timespan=All years |

**DATABASE:** EPPI-Centre TRoPHI

Date: May 17, 2021


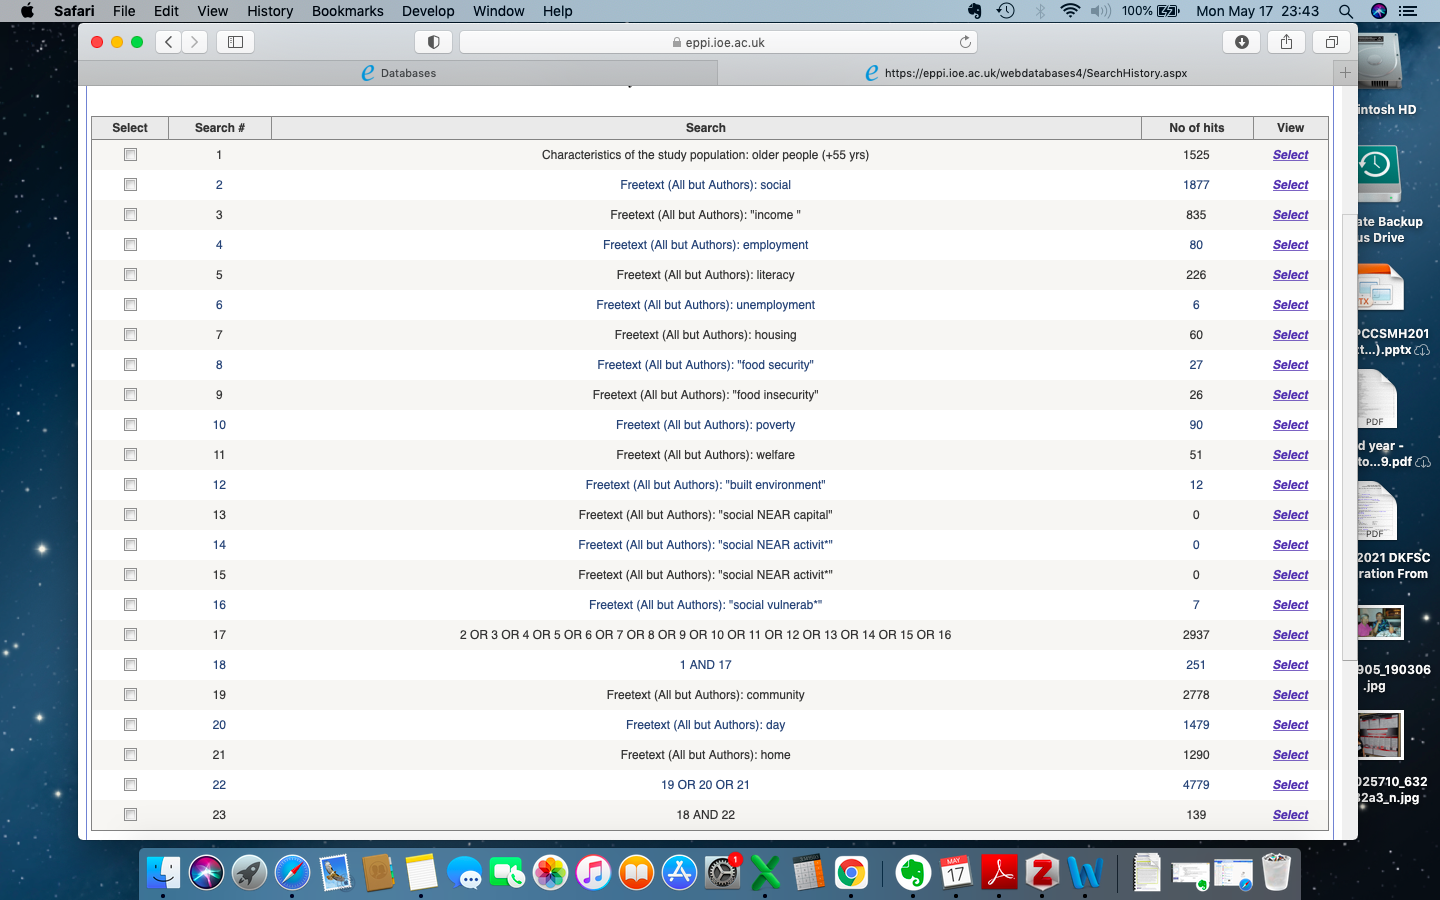


# Supplement B. Data Collection Form

| **Information** | **Data Collected** |
| --- | --- |
| **Data Collection for Primary Objective (Effectiveness)** | |
| General information | - Author, year, full citation - City, Country |
| Study design | - Study aim - Study design |
| Population | - Target population - Actual population (age, gender, living alone, socioeconomic status, language, baseline health, inclusion of cognitive impairment/dementia) |
| Intervention details | - Primary social determinant of health category targeted by intervention (Figure 1 categorizations) - Description of intervention - Intervention providers & stakeholders - Intervention setting & context - Intervention duration & frequency - Comparison group description |
| Results and outcomes | - Total sample size (and per group) - Main statistical methods - Missing, follow up, attrition - Per outcome:   - Measure   - Measurement time   - Result (effect size, measure of variance as available)   - Primary or secondary outcome   - Direction of effect |
| Key author conclusions |  |

# Supplement C. Methods of Quantitative Data Synthesis

Supplement C. Characteristics of interventions included in review, by intervention category (grey columns = audit by second reviewer)

| **Reference, Year**  **(Location)**  **[Setting]** | **Intervention** | **Intervention Stakeholders** | **Target Population** | **Actual Population (Intervention)** | **Adoption** | **Facilitators** | **Barriers** |
| --- | --- | --- | --- | --- | --- | --- | --- |
| **Intervention Category = [Strengthening] Social and Community Context** | | | | | | | |
| Bae et al, 2019  (Takahama City, Japan)  [Community or public spaces] | Kenkojiseichi combines group based physical, cognitive, and social activities (16 times each) in 90-minute sessions twice per week for 24 weeks. Each supervised session consisted of condition checks, stretching, main activity, followed by report writing & discussion. | - Individuals - Group members - Staff (middle aged women, non-HC from community) - Funders (Government & Academic institution) | Older adults 60y+ with MCI and without a certification of needing care from Japan's LTCI (insurance). | - Age: 75.5y - Female: 43.9% - Edu: 11y - MMSE: 27.1 | Retention: 67%  Attendance: 70.2% (I) vs. 82.9% (C)  Satisfaction: 96.1% | Program factors: 1) Allow participants to choose own activities (as long as frequency maintained), (2) (staff confirm attendance, managed scheduled and provided feedback on activity reports) | n.d. |
| Blancofort et al, 2021  (Barcelona, Spain)  [Community or public spaces] | Sentire-nos Be (Feeling Well) is an intervention in 12 weeks. Sessions are held weekly for two hours and facilitated in groups of 15 people. 9/12 sessions were delivered in primary care centers and the remaining were held in public spaces for social & physical activities. | - Individuals - Group members - Staff (9 HC workers - SWs, RNs, GPs) - Funder (NPO, university or academic center) | Community dwelling adults 60y+ in disadvantaged urban areas who perceived their health as fair or poor.  Excluded: cognitive impairment, dementia, contraindication to physical activity, any severe mental health problems or end-of-life situation. | - Age: 73.6y - Female: 81.4% - Alone: 40.8% - Edu: 82.2% no formal - Meds: 5 chronic meds* | Retention: 99.5% (I) vs. 84.1% (C) | n.d. | n.d. |
| Boen et al, 2012  (Oslo, Norway)  [Senior centers] | A programme consisting of weekly 3h group meeting 35-38 times per year with 7-10 participants. Programme included (1) transportation to and from senior centre, (2) a warm meal at low cost, and (3) a physical training program developed by physical therapists, run by trained volunteers. | - Individuals - Group members - Volunteers - Staff (RN – project lead, PT – programme developer) - Senior Centres (owned by government) - Funder (university / academic center) | 65y+ living at home in the community, not regular users of the senior centre. | - Age: 59.5% > 80y - Female: 59.5% - Alone: 59.5% - Edu: 37.8% college + | Retention: 48% (I) vs. 90% (C) | Participant/program factors: 40% of women made new friends and had more friend visits at home.  Program factor: Attendance tracked | Program factors: Supposed to be older adults with depression but eventually had to recruit all people due to low numbers.  Participant factors: Too much stress or illness preventing participation. Also reported distress and lack of initiative.  Program factors: weekly meetings for one year were too onerous. |
| Jacobs et al, 2020  (California, Florida and New York, USA)  [Home and community or public spaces] | Peer-to-peer (P2P) is a minimum 1-year program matching an older adult with a trained volunteer in the same community. Volunteers provide transportation assistance, check-in calls, social activities, help with shopping, organizing services and trips to medical appointments. | - Individuals - Volunteers - Staff (trainers) - Community service organization - NPO | 65y+, living independently in the community, living at or below the poverty line (or on a fixed income that makes living expenses challenging), who are socially isolated, and who have chronic illnesses requiring frequent community resource use. | - Age: 80y - Female: 81% - Alone: 79.7% - Ethnicity: 78% White - Language: Spanish 5% | Retention: 92.3% | Program factors: Matched dyads | Program factors: No tracking on number of services utilized |
| Hikichi et al, 2015  Hikichi et al, 2017  (Taketoyo, Japan)  [Senior centers] | Salons are a community project where seniors can congregate and participate in social activities. Salons were not standardized across locations. Popular activities included dance classes, chatting with other participants, arts and crafts, music quizzes and games, and interactive activities with children. Seniors visited 1-3 times per month for 90-120 minutes per session. Fee of 100 yen per visit ($1USD). | - Individuals - Group members - Community volunteers - Program staff (OTs) - Funders (government, university) | All community-dwelling adults 65y+ adults who were physically and cognitively independent in the town of Taketoyo from the participants in the Aichi Gerontological Evaluation Study. | - Age: 68.3% between 65-74y - Female: 49.6% - Med: >90% had 1 or less chronic conditions | Retention (3 years) = 87.4% (participating >2 times per week) | Program factors: salons increased receipt and provision of social support and networks | Participant factors: death, functional decline, relocation |
| Harada et al, 2020  (Kobe City, Japan)  [Community or public spaces] | Tsurukabuto Active Aging Project is an events-based community program organized by Kobe University staff to create opportunities to meet and talk with neighbors and improve neighborhood social networks. Community events once per month including musical entertainment, lectures about sleep and health promotion, moon viewing, academic festivals, gardening, and group walking. | - Individuals - Neighbours - Project facilitators - Kobe University | 60y+, residents of the Tsurukabuto community from the electoral register in Nada Ward. | - Age: 72 - Female: 56.3% - Alone: 20.5% - Edu: 45.6% had a degree |  | System factors: Healthy Japan 21 released around the same time by Health Labour and Welfare. | Program Factors: Low dosage of intervention, (perhaps more frequent and longer duration needed)  Participant factors: Potential for selection bias and reverse causality. |
| Liotta et al, 2018  (Rome, Italy)  [Home] | The Long Live the Elderly (LLE) program includes a multi- dimensional evaluation of care needs, an individual care plan including provision of services, periodical phone calls and increased support when negative events occur. The program intensifies when a heat wave occurs and all those over 75 years are traced by phone with staff or volunteers bringing food or medicine during home visits. | - Individuals - Volunteers - Staff (operators) - Funder (government) | Population 75y+ living in three urban areas in Rome. | - Age 79.4y - Female: 60.6% | Refusal to participate: <2% | Program factors: Active focus on increasing community resilience & capacity to cope with consequences of disasters (by improving the residential environment either by dealing with the social environment or the physical environment).  System factors: This program builds on the existing heat watch warning systems implemented by Italian national government. |  |
| Chapin et al, 2013  (Kansas, USA)  [Home and community or public spaces] | Reclaiming Joy uses dyadic relationships between volunteers and participants to guide participants through goal setting activities and to foster connections to community resources. Meetings once a week for 10 weeks. | - Individuals - Trained volunteers - Staff (case managers from agencies on aging) - Funder (state government) | 64y+, receiving Medicaid in three regions served by area agencies on aging, exhibiting at least one symptom of depression and/or anxiety. | - Age: 76 y - Female: 78% - Alone: 75% - Ethnicity: 97% | Retention: 80% | Program Factors: 1) Careful matches, 2) Program developed with input from service providers, policymakers and participants, 3) Individual follow up with case managers, and 4) Tracking of intervention progress through q2-3 week check ins with volunteers. | n.d. |
| Daban et al, 2021  (Barcelona, Spain)  [Community or public spaces] | The intervention in disadvantaged neighbourhoods consisted of weekly outings facilitated by volunteers using a portable climbing wheelchair to promote social support and participation activities such as visiting friends, walks, going to the market or attending church. Group outings were also conducted to foster social relationships. | - Individuals - Group members - Equipment and community development plan by Primary Health Care, Social Services, Red Cross Barcelona and the Barcelona Public Health Agency | 59y+, living in isolation in their homes for two or more months due to mobility limitations and/or lack of an elevator in their buildings.  Excluded: bedridden persons, persons with severe dementia and those without medical authorization to leave their home. | - Age: 44.8% > 85y - Female: 58.5% - Edu:76.8% primary school or less | Retention: 91.8% | System factors: Program launched at the same time the Catalonian Department of Health launched the COMSALUT programme (redirecting Primary Health Care towards health promotion and community health)  Program factors: intervention was co-produced with a number of different stakeholders.  Participant factors: Those who had the least amount of social interactions benefited the most | Participant factors: Change of address, hospitalizations, death |
| Coll-Planas et al, 2017  (Catalonia, Spain)  [Senior centers, community or public spaces] | A coordinated and group-based program aimed at building and strengthening the network between primary healthcare centers, senior centers and other community assets in the neighborhood. Meetings were 1.5 hours a week for 15 weeks and included (1) social isolation and participation discussions, (2) community assets introductions, (3) visits to community assets including primary care, and (4) arts based activities. | - Individuals - Group members - Volunteers - Group facilitators - Health and social care professionals - Funder (government) | 60y+, community dwelling, who feels lonely "sometimes, often or always", can walk to the center independently, without cognitive decline, able to participate in group dynamic, and does not usually participate in social activities. | - Age: 77.2 - Female: 95% - Alone: 84% - Edu: 82% primary studies or less - Med: 79% had ≥ 4 chronic medical conditions | Retention: 68% | Program factors: low cost because it uses existing professionals and services but creates new roles including a new volunteer profile. | Participant factors: health problems or family reasons. |
| Chiang & Hsu, 2018  (Taichung, Taiwan)  [Senior centers] | Community Care Centers (CCC) provide health promotion, food services, home visits and telephone greetings. Home visit and telephone greetings are intended to increase social participation and linkages. CCCs are required to be set up in every neighbourhood. Programs included physical activities, health knowledge courses, and leisure activities (i.e. arts) | - Individuals - Volunteers - Staff - Funders (community NPO, local government) | All older adults living in the community | - Age: 76.33y - Female: 76% - Alone: 13.7% - Edu: 70% elementary school or below | n.d. | Program/ Organizational factors: Salaried CCC managers and staff (vs. volunteers) associated with better relationships with participants and families. | Program/Organizational factors: Task oriented leadership styles (vs. laissez faire styles) as associated with reduced community participation. |
| Taylor et al, 2017  (Queensland, Australia)  [Community or public spaces] | Men's sheds provide a variety of activities including woodwork, metalwork, group social events, mentorship, and restoration projects. It is open five days a week and overseen by a management committee. | - Individuals - Volunteers - Management committee (president, secretary, treasurer and coordinator) - NPO | Men over 65 years of age, from regional or remote areas, from low socioeconomic areas. | - Age: 71 - Alone: 13% - Language: 87.4% English - Edu: 76% high school or less | Median program attendance: 3 years | Program factors: the activities are designed to promote work interests after retirement. Also, there is a lack of hierarchy and defined commitment. | Participant factors: Many participants also volunteer with other organizations. |
| **Intervention =[Enhance] Neighbourhood and Build Environment** | | | | | | | |
| Park et al, 2021  (PyeongChang, South  [Home and community or public spaces] | Aging Study of PyeongChang Rural Area Intervention Study (ASPRA-IS) is a 24-week multi-component intervention program including home nutritional supplementation, depression management, discontinuation of high-risk medication, home hazard reduction and group exercise training. | - Individuals - Group members - Licensed exercise trainers - Geriatrician or psychiatrist - RNs and SWs (for home assessments) - Funder (university/ hospital) | 65y+, living in the region, living alone or receiving medical aid (government public assistance program) designated for low-income status. | - Age: 77.1 - Female: 75.9% - Alone: 77.0% - Edu: 4.1y - Frailty Index: 0.27 | Retention (30 months) = 79% (I) vs. 62% (C) | Program factors: Long program duration.  Participant factors: Almost all participants receive medical care from the same provider (high fidelity) | Participant factors: Higher dropout among higher disability and lower cognition. |
| Castle & Resnick, 2016  (Pittsburg, USA)  [Affordable housing] | Staying at Home (SAH) program involves on site (1) Care Coordination, (2) Advanced Planning, (3) Medication Management, (4) Health Care Diary/Outreach, and (5) All services paid by local health provider. | - Individuals - Trained SWs & RNs - Consultant MD - Funder (state government) | Older adults living in publicly subsidized elderly high-rise buildings | - Female: 86% - Alone: 58% widowed - Ethnicity: 76% White | n.d. | n.d. | n.d. |
| Tohn et al, 2020  (Connecticut, USA)  [Home] | An injury prevention intervention was added to the standard weatherization packages. An occupational therapist assessed home injury risk factors and identified priority modifications to reduce the risk of falls. An energy auditor accompanied the OT to improve weatherization. 1 year with 5 visits. | - Individuals - OT - Energy auditor - Community Action Agency - Government | 70y+ who had a slip or fall in the prior six months, from low-income households with income up to 125% of federal poverty income, and eligibility for weatherization services or home energy upgrades. | - Alone: 88% | n.d. | System factors: weatherization energy auditors and crews offer a natural workforce that could help implement injury prevention interventions to reduce the likelihood of a costly fall related injury in home | n.d. |
| Gusmano, et al, 2018  (New York, USA)  [Affordable housing] | Self-help Active Services for Aging Model (SHASAM) provides social services provided as part of affordable housing. On-site social workers (1) assess residents for existing government programs & entitlements, (2) receive personalized functional and psychological assessments, counseling and advocacy, (3) health education & wellness programs, (4) physical activity & socialization programs, and (5) evaluation for a referral out to additional public services (i.e. chronic disease programs or in-home safety technology). | - Individuals - SWs - Staff - Funder (government) | 65+, who live in affordable housing buildings, and who are Medicare beneficiaries | - Age: 80y* - Ethnicity: 55% non Hispanic Asian | n.d. | n.d. | System factors: neighbourhood level factors not accounted for (i.e. crime) |
| Callaghan et al, 2017  (England, UK)  [Home] | Shared Lives (SL) is a service where an adult who needs support or accommodation moves into (or regularly visits) the home of an approved SL carer. | - Individuals - SL carer - Staff (coordinators) - NPO | 65y+ people with learning disabilities, using any form of SL support with capacity for consent. | - Age: 77y - Female: ~half - Ethnicity: 98% British | n.d. | Program factors: 1) Careful matching by staff, and 2) Carers are paid a fixed amount. | n.d. |
| Turcotte et al, 2019  (Massachusetts, USA)  [Affordable housing] | Community health worker assessment followed by an individualized intervention plan. Home visits consisting of (1) environment mediations such as pest management, mattress encasements, cleaning supplies, and structural interventions like repairing ventilation or plumbing, and (2) culturally and literacy appropriate education. | - Individuals - Community health workers - Environmental assessor - Funder (government) | 62y+ adults with, low-income, diagnosed with asthma by a MD, residing in public and private subsidized housing | - Age: 69.5y - Female: 69.8% - Ethnicity: 70.9% - Edu: 64% less than high school - SES: 72.1% below median household income | Retention: 92.5% | Program factors: Community health workers are culturally aware and proficient in the languages (Spanish and Khmer) of the enrolled Individuals. | Participant factors: the percentage of older adults that did not complete high school was noticeably higher than in similar children's studies. This could have decreased the effectiveness of educational interventions on asthma triggers.  System factors: due to location of intervention, contractors had been pre-determined by housing authority, resulting in poor quality pest control (some participants had ongoing pest problems even at the end of the intervention). |
| Turcotte et al, 2019  (Massachusetts, USA)  [Affordable housing] | Community health worker assessment followed by an individualized intervention plan. Home visits consisting of (1) environment mediations such as pest management, mattress encasements, cleaning supplies, and structural interventions like repairing ventilation or plumbing, and (2) culturally and literacy appropriate education. | • Individuals  • Community health workers  • Environmental assessor  • Gov Funder | 62y+ adults with, low-income, diagnosed with asthma by a MD, residing in public and private subsidized housing | - Age: 69.5y - F: 69.8% - Edu: 64% less than high school - SES: 72.1% below median household income | 92.5% retention | Community health workers are culturally aware and proficient in the languages (Spanish and Khmer) of the enrolled Individuals. | 1) %older adults that did not complete high school was noticeably higher than in similar children's studies. This could have decreased the effectiveness of educational interventions on asthma triggers, 2) due to location of intervention, contractors had been pre-determined by housing authority, resulting in poor quality pest control (some participants had ongoing pest problems even at the end of the intervention). |
| **Intervention = [Improving] Navigation of Health and Social Services** | | | | | | | |
| Galbraith et al, 2017  Balaban et al, 2015  (Massachusetts, USA)  [Home from hospital] | Patient navigators (PNs) conduct introductory visit(s) with the patient and caregivers, then weekly telephone meetings. PNs (1) organize appointments and rescheduling, (2) address barriers to obtaining or taking medications, (3) identify concerning symptoms and facilitate communication with MD offices, (4) assist with transportation, (5) reassess patients’ home care needs and make connections to community services, (6) assist with health insurance issues, and support patient self-management, and (7) help patients navigate the health care system. | - Individuals - Caregivers - Patient Navigators/ Community Health Workers (trained lay people from the community) - Staff (RN) - Funder (Agency for Healthcare Research and Quality) | General medicine inpatients having at least one of the following readmission risk factors: (1) age ≥60y, (2) any in-network inpatient admission within the past 6 months, (3) length of stay ≥3 days, (4) admission diagnosis of heart failure, or (5) chronic obstructive pulmonary disease. | - Age: 74y - Female: 60.6% - Ethnicity: 58% White | Retention: 78.3% (I) vs. 77.7% (C) | Participant factors: Compared with younger participants, those >60 y showed more improved results.  System factors: Increased benefit in a system with risk bearing contracts, quality performance rating and readmission penalties (not fee-for-service). | Program factors: Not long enough to see benefit in <60y participants. |
| Evans et al, 2021  (Chicago, USA)  [Home from hospital] | The Chicago Southland Coalition for Transition Care program (CSCTC) is a social worker driven care transition program to coordinate a post hospital course. Following the Coleman Care Transition Intervention (CTI) model, it (1) manages health care, meds, and nutrition, (2) communicates more effectively with physicians, and (3) connects to community resources such as meal delivery, payment assistance for meds and transportation. CSCTC supplies patients with pharmacy free support services and home-delivered meals. | - Individuals - Caregivers - SWs - Catholic Charities of the Archdiocese of Chicago - Funder (federal government through Medicare and Medicaid) | Four hospitals that serviced 70 low-income zip codes in Chicago Southland area. | - Age: 71.5y - Female: 57.8% - Ethnicity: 35.3% African American | n.d. | Program factors: 1) Relatively inexpensive intervention, 2) Social workers rather than nurses (save costs & SWs can also address non-medical factors).  System factors: Connections between Church charities and hospitals.  Participant factors: Well suited to lower SES populations. | n.d. |
| Prior et al, 2012  (Midwestern, USA)  [Home] | A faith based, grant funded, community senior outreach program provided by a large healthcare provider. The program focuses on assisting clients towards stabilization of crisis situations and the development of a plan for ongoing social interventions. Clients receive weekly in-home visits for the first 2 to 3 months and biweekly to monthly visits thereafter depending on need. Emphasis placed on utilization of community resources, development of self-management skills, resolution or reduction of in financial concerns and connection with social and family supports. Program monies are utilized to assist with prescription costs, housing, and transportation needs to know other resources are available. | - Individuals - Caregivers - RN, SW - Financial counselors - Volunteers - Grant-funder | 55y+, with histories of repeated ED or hospital visits, who are part of the senior outreach program (usually < $1000 per month, 1/3 live in subsidized housing) | - Age: 69.5y - Alone: 45% - Ethnicity: 55% White, 41% African American - Housing: 1/3 subsidized housing | Response: 58.5% | Program factors: Focused on alleviating financial concerns and increasing satisfaction with social support. Regular visits by staff improved participants’ feelings of support. | n.d. |
| Scharlach et al, 2015  (San Diego, USA)  [Home] | ElderHelp Concierge Club is a volunteer run membership program. Members receive an assessment for services eligibility which includes: (1) driving, (2) grocery shopping, (3) housekeeping, (4) home maintenance and repair, (5) financial advocacy, (6) friendly visits, (7) and pet care. There are 3 tiers of service. Dues follow a capitated model and are dependent on income and home ownership. | - Individuals - Volunteers - Staff (intake specialist, volunteer liaison, care manager) - Preferred Providers | 60y+, who do not have a condition that would prevent them from participating fully in their own care. | - Age: 76y* - Female: 91% - Alone: 67% - Ethnicity: 85% White - SES: 52% <$13,000/yr | n.d. | Program factors: 1) Attempts to increase consumer control to focus on greater consumer responsibility and involvement in service provision and payment, 2) Graded and matched levels of care coordination to need. Having a liaison to contact when assistance is needed contributes to greater perceived ability to age in place, 3) Using volunteers to provide non-professional community support services increases efficiency and reduces operational cost by producing greater output, using fewer organizational resources, yielding value for exceeding program cost, and 4) heavy reliance on volunteers, discounted services from service providers and capitated user fees resulting in increased consumer control, more diversified financing resources, and increased service access for persons not eligible for Medicaid or other public programs. | n.d. |
| Stevens et al, 2015  (Texas, USA)  [Home from hospital] | The community living program (CLP) includes (1) plan of care based on formal assessment, (2) health coaching, (3) money for purchasing formal care ($750/month), and (4) home visits & telephone calls. 6 home visits and 3 telephone calls over 10 months. | - Individuals - Caregivers - Social workers - Funder (government) | 60y+, a resident of central Texas Agency in an Aging service area, functionally impaired in ≥2ADLs, memory or health problems that make it difficult to live alone, and availability of informal support system. | - Age 80.3, - Female: 52.4% - Ethnicity: 85.9% White, 10.1% Black, - Alone: 23.5% - SES: Below poverty line: 53% - Med: 3-7 ADL limitations | Retention: 67.1% | Program factors: evidence based (follows Care Transitions Intervention & REACH II protocols). | n.d. |
| Watkins et al, 2012  (Southeastern USA)  [Home from hospital] | Hospital to Home Program involves a frail elder navigator who identifies eligible participants during hospital admission, arranges social supports to begin immediately after discharge, and home visits within 72 hours of discharge. The navigator reviews orders and medications, confirms services and helps the patient and family identify other needs. Services including transportation, light housekeeping, laundry, meal preparation, prescription pick up and grocery shopping were provided at no cost to the patient up to 4 months. | - Individuals - Caregivers - Social workers - Home care agencies - Funder (NPO) | 65+, eligible for Medicare +/- Medicaid, with 2+ risk factors ( 2+ chronic conditions, physical disability or functional decline requiring assistance with ADLs, falls, polypharmacy, cognitive decline or depression, >3 physician or ED visits or hospitalizations in the past six months, nutritional impairment, hip fracture, limited social support) | - Age: 80y - Alone: 52% - Ethnicity: 72% White - SES: 45% in poverty - Med: 88% chronic conditions | Retention: 92.5% | Participant factors: “They cared a lot about me not going back to the hospital. That was awesome that people cared so much about me.”  Program factors: social workers are appropriate as a transition navigator because they are trained in assessing home needs and assessing special community resources to support a safe and sustainable living environment after discharge. | Program factors: glitches in coordination or services, program could have lasted longer. |
| Szanton et al, 2011, 2015, 2016, & 2019  Crews et al, 2019  (Maryland, USA)  Spoelstra et al, 2019  (Michigan, USA)  [Home] | Community Aging in Place: Advancing Better Living for Elders (CAPABLE) CAPABLE involves ~ 10 in-home sessions, each 60 minutes long, over a 6-month period (depends on paper). It draws upon best practices to enhance uptake and adoption of intervention strategies such as patient-centered care and motivational interviewing. All participants in the intervention received each component of the intervention (assessment, education, interactive identification of barriers to function with joint discussion of possible retraining and solutions), but interventionists customized components to each participant’s risk profile and goals. Includes up to $1300 USD for repairs. | - Individuals - Caregivers - Interventionists (SWs, RNs, OTs) - Handyman - Funders (grant agencies, government, universities/ hospitals) | 65y+, cognitively intact, difficulty with at least 1 ADL or 2 IADLs, income <200% of federal poverty line. | - Varies according to study | Varies | Program factors: (1) expansion into several states and cities, (2) flexibility and adaptability of the intervention, (3) evidence based (i.e. society to cell resilience framework, socio-ecological), (4) flexible use of available personnel, (5) patient directed (not patient centered). | Participants: possible biases (i.e. some were part of focus groups prior to intervention, healthy worker bias) in population  Program factors: training required for clinicians to focus on functional goals rather than disease management |
| **Intervention = [Promoting] Education** | | | | | | | |
| Suominen et al, 2015  (Helsinki, Finland)  [Home] | One year intervention with tailored nutritional guidance with home visits, and discussions with the participants and their caregivers every three months with 1-2 group sessions The nutritionist visited each couple between four and eight times according to the participants’ individual needs. | - Individuals - Caregiver - Nutritionists - Funder (university /hospital) | A 65y+ person with dementia living with spouse, with ability to reach the study place by taxi & the ability to stand on a scale, living in the Helsinki metropolitan area, without terminal disease, & an estimated life expectancy  of at least half a year. | - Age: 78.2 - Female: 53% - MMSE: 18.8 | Retention: 78% | Program factors: tailored nutrition program | Participant factors: death, non-adherence or difficulty following instructions. |
| Jo et al, 2018  (Ontario, Canada)  [Educational institution] | Canada Enoch Senior's College (CESC) runs weekly sessions for a duration of 8-11 weeks biannually. Each day is divided into four time slots. The morning is an organized assembly with short lectures on Korean-relevant topics. Lunch is a traditional Korean style congregate meal. Afternoons are elective classes and small groups (arts, music, technology, medicine, etc.). | - Individuals - Volunteers - Korean church | Korean immigrant older adults in the Greater Toronto Area | - Age: 74.1 - Female: 77% - Language: Korean (majority) - Ethnicity: 100% Korean-born | n.d. | Participant factors: Korean seniors have a strong desire to maintain ethnic ties and surround themselves with familiar cultural touchdowns. "Where else can we meet Korean people".  Program factors: Primary language Korean. Focus on food is a highlight.  System factors: “unlike in Korea where there were multiple places for retired seniors to hang out, as immigrants in Canada we have no place to go, no one to talk to you, nothing to do. So it's important that we have enough college where we can meet once a week and socialize.” | Participant: Already a high functioning group. |
| Molina-Luque et al, 2018  (Catalonia, Spain)  [Educational institution] | Senior Programme of the University of Lieda is a four year program. Senior students choose a field of study that puts into practice their previous knowledge. These students also participate in extra-curricular programs ("social innovation for active and healthy ageing for sustainable economic growth" (SIforAGE) and "together old and young" (TOY)) | - Individuals - Classmates - Children matches - University of Leida | >55y | - Age: 58-62y | n.d. | Participant factors: Participants felt they could recover hobbies postponed in previous stages of life due to family and professional obligations.  Program factors: Challenges the idea of old age as a period in life dominated by frailty, inactivity, and passiveness, as depicted by the so-called narrative of decline. | n.d. |
| **Intervention = [Help with] Economic Stability** | | | | | | | |
| Aguila & Smith, 2020  Aguila et al, 2015  (Yucatan, Mexico)  [Home] | Reconocer Urbano is a supplementary income program providing a monthly supplement of MXN$550 for 18 months. | - Individuals - State government | All 70y+ residents who are eligible for supplemental income programs. | - Age: 77.6y - Female: 54% - Alone: 13.14% - Language: Maya 77% - Edu: 1.77y | n.d. | Program factors: Town by town roll out (by size: smallest to largest). | n.d. |
| Herity et al, 2018  (North Carolina, USA)  [Home] | Senior PharmAssist optimizes medication management while addressing social determinants. Scheduled meetings occur every 6 months. Meetings with pharmacists for (1) medication therapy management, (2) education, (3) medication copayment assistance, (4) Medicare insurance counseling, and (5) referral to other services. Program flexible (open 40h/week) or provides home visits. | - Individuals - Pharmacists - Staff (executive director, development and communications director, community services director, health resources coordinator) - NPO | 60y+, Medicare-eligible, have an income of 200% of the federal poverty level or less. | - Age: 69.8y - Female: 70.7% - Alone: 48.7% - Ethnicity 59.7% African American - Edu: 59.2% high school or less - Med: 6.8 chronic conditions | 24-month adherence: 39.3% | Follow-up time: 18 months* | Participant factors: (1) Insufficient time for program, (2) Became ineligible for copayment or co-payment no longer needed, (3) Death  Program factors: Recruitment of healthy participants. |

N.B:

* Indicates median reported, otherwise results reported in means or proportions

Acronyms: ADL = Activities of daily living, (C) = Control Group, ED = Emergency department, Edu =Education, GP = General practitioner, (I) = Intervention Group, HC = Healthcare, LTCI = Long term care insurance, MCI = Mild cognitive impairment, MD = Medical doctor, Med = medications or medical conditions as reported, n.d. = not described, NPO = nonprofit organization, OT = Occupational therapist, PT = Physiotherapist, RN = Nurse, y = years

# Supplement D. Detailed Critical Appraisal using the Mixed Methods Appraisal Tool (MMAT)

Supplement D1. Summary MMAT quality scores

|  |  | **MMAT score** | | | | | |
| --- | --- | --- | --- | --- | --- | --- | --- |
|  | n | 0% | 20% | 40% | 60% | 80% | 100% |
| Quantitative, RCTs | 9 | 1 | 0 | 1 | 4 | 2 | 1 |
| Quantitative, non randomized (CBA, RC, XCS) | 11 | 0 | 0 | 2 | 3 | 3 | 3 |
| Quantitative descriptive (UBA, RU, XUS) | 11 | 0 | 0 | 2 | 4 | 5 | 0 |
| Mixed Methods | 2 | 0 | 0 | 1 | 0 | 1 | 0 |
| Qualitative | 1 | 0 | 1 | 0 | 0 | 0 | 0 |

Supplement D2. Cross tabulations of intervention type and study design

|  | | **RCT** | **CBA** | **RCS** | **XCS** | **Total with control group** | **UBA** | **RU** | **XUS** | **MM** | **Total without control group** | **Q** |
| --- | --- | --- | --- | --- | --- | --- | --- | --- | --- | --- | --- | --- |
| Social & Community Context | | 3 | 3 | 1 |  | **7** | 3 |  | 1 | 1 | **5** |  |
| Navigation of Health and Social Services | | 1 |  | 1 |  | **2** | 4 |  |  |  | **4** |  |
|  | CAPABLE | 3 | 1 |  |  | **4** | 1 |  |  |  | **1** |  |
| Neighbourhood and Built Environment | | 3 |  | 1 | 1 | **5** |  |  | 1 |  | **6** |  |
| Education | | 1 |  |  |  | **1** |  |  |  | 1 | **1** | 1 |
| Economic Stability | | 1 |  |  |  | **1** |  | 1 |  |  | **1** |  |

Supplement D3. Detailed critical appraisal using MMAT of individual studies in alphabetical order (grey columns = audit by second reviewer)

| **References** | 1.1 | 1.2 | 1.3 | 1.4 | 1.5 | Sum | 2.1 | 2.2 | 2.3 | 2.4 | 2.5 | Sum | 3.1 | 3.2 | 3.3 | 3.4 | 3.5 | Sum | 4.1 | 4.2 | 4.3 | 4.4 | 4.5 | Sum | 5.1 | 5.2 | 5.3 | 5.4 | 5.5 | Sum |
| --- | --- | --- | --- | --- | --- | --- | --- | --- | --- | --- | --- | --- | --- | --- | --- | --- | --- | --- | --- | --- | --- | --- | --- | --- | --- | --- | --- | --- | --- | --- |
|  | Qualitative | | | | | | Quantitative, RCTs | | | | | | Quantitative, non randomized | | | | | | Quantitative descriptive | | | | | | Mixed methods | | | | | |
| Aguila & Smith, 2020  Aguila, et al 2015 |  |  |  |  |  |  | CT | Y | Y | Y | Y | 80% |  |  |  |  |  |  |  |  |  |  |  |  |  |  |  |  |  |  |
| Bae et al, 2019 |  |  |  |  |  |  | Y | Y | N | Y | Y | 80% |  |  |  |  |  |  |  |  |  |  |  |  |  |  |  |  |  |  |
| Bae et al, 2019 |  |  |  |  |  |  | Y | Y | N | Y | Y | 80% |  |  |  |  |  |  |  |  |  |  |  |  |  |  |  |  |  |  |
| Blancafort et al, 2021 |  |  |  |  |  |  | Y | N | Y | N | Y | 60% |  |  |  |  |  |  |  |  |  |  |  |  |  |  |  |  |  |  |
| Boen et al, 2012 |  |  |  |  |  |  | CT | CT | N | CT | CT | 0% |  |  |  |  |  |  |  |  |  |  |  |  |  |  |  |  |  |  |
| Boen et al, 2012 |  |  |  |  |  |  | CT | CT | N | N | CT | 0% |  |  |  |  |  |  |  |  |  |  |  |  |  |  |  |  |  |  |
| Callaghan et al, 2017 |  |  |  |  |  |  |  |  |  |  |  |  | Y | Y | Y | Y | Y | 100% |  |  |  |  |  |  |  |  |  |  |  |  |
| Castle & Resnick, 2016 |  |  |  |  |  |  |  |  |  |  |  |  | N | Y | N | Y | CT | 40% |  |  |  |  |  |  |  |  |  |  |  |  |
| Chapin et al, 2013 |  |  |  |  |  |  |  |  |  |  |  |  |  |  |  |  |  |  | Y | CT | Y | Y | Y | 80% |  |  |  |  |  |  |
| Chiang & Hsu, 2018 |  |  |  |  |  |  |  |  |  |  |  |  |  |  |  |  |  |  | Y | CT | Y | N | Y | 60% |  |  |  |  |  |  |
| Coll-Planas et al, 2017 |  |  |  |  |  |  |  |  |  |  |  |  |  |  |  |  |  |  | Y | CT | Y | N | Y | 60% |  |  |  |  |  |  |
| Crews et al, 2019 |  |  |  |  |  |  | CT | Y | N | Y | Y | 60% |  |  |  |  |  |  |  |  |  |  |  |  |  |  |  |  |  |  |
| Daban et al, 2021 |  |  |  |  |  |  |  |  |  |  |  |  |  |  |  |  |  |  | Y | CT | Y | Y | Y | 80% |  |  |  |  |  |  |
| Evans et al, 2021 |  |  |  |  |  |  |  |  |  |  |  |  | Y | Y | Y | Y | Y | 100% |  |  |  |  |  |  |  |  |  |  |  |  |
| Evans et al, 2021 |  |  |  |  |  |  |  |  |  |  |  |  | Y | Y | Y | Y | Y | 100% |  |  |  |  |  |  |  |  |  |  |  |  |
| Galbraith et al, 2017  Balaban et al, 2015 |  |  |  |  |  |  | Y | N | N | CT | Y | 40% |  |  |  |  |  |  |  |  |  |  |  |  |  |  |  |  |  |  |
| Gusmano et al, 2018 |  |  |  |  |  |  |  |  |  |  |  |  | Y | N | Y | Y | CT | 60% |  |  |  |  |  |  |  |  |  |  |  |  |
| Harada et al, 2020 |  |  |  |  |  |  |  |  |  |  |  |  | CT | Y | N | Y | Y | 60% |  |  |  |  |  |  |  |  |  |  |  |  |
| Herity et al, 2018 |  |  |  |  |  |  |  |  |  |  |  |  |  |  |  |  |  |  | Y | N | Y | N | Y | 60% |  |  |  |  |  |  |
| Herity et al, 2018 |  |  |  |  |  |  |  |  |  |  |  |  |  |  |  |  |  |  | Y | N | Y | N | Y | 60% |  |  |  |  |  |  |
| Hikichi et al, 2015 & 2017 |  |  |  |  |  |  |  |  |  |  |  |  | CT | Y | Y | Y | Y | 80% |  |  |  |  |  |  |  |  |  |  |  |  |
| Jacobs et al, 2020 |  |  |  |  |  |  |  |  |  |  |  |  | Y | Y | Y | Y | Y | 100% |  |  |  |  |  |  |  |  |  |  |  |  |
| Jacobs et al, 2020 |  |  |  |  |  |  |  |  |  |  |  |  | Y | Y | Y | Y | Y | 100% |  |  |  |  |  |  |  |  |  |  |  |  |
| Jo et al, 2018 | Y | Y | Y | Y | Y | 🡪 |  |  |  |  |  |  |  |  |  |  |  |  | Y | N | Y | N | Y | 🡪 | Y | Y | Y | Y | N | 80% |
| Liotta et al, 2018 |  |  |  |  |  |  |  |  |  |  |  |  | Y | Y | Y | Y | CT | 80% |  |  |  |  |  |  |  |  |  |  |  |  |
| Liotta et al, 2020 |  |  |  |  |  |  |  |  |  |  |  |  | Y | Y | Y | Y | CT | 80% |  |  |  |  |  |  |  |  |  |  |  |  |
| Molina-Luque et al, 2018 | Y | CT | CT | Y | CT | 20% |  |  |  |  |  |  |  |  |  |  |  |  |  |  |  |  |  |  |  |  |  |  |  |  |
| Park et al, 2021 |  |  |  |  |  |  |  |  |  |  |  |  | Y | Y | N | Y | Y | 80% |  |  |  |  |  |  |  |  |  |  |  |  |
| Prior et al, 2012 |  |  |  |  |  |  |  |  |  |  |  |  |  |  |  |  |  |  | Y | Y | Y | N | Y | 80% |  |  |  |  |  |  |
| Scharlach et al, 2015 |  |  |  |  |  |  |  |  |  |  |  |  |  |  |  |  |  |  | Y | N | Y | Y | Y | 80% |  |  |  |  |  |  |
| Spoelstra et al, 2019. |  |  |  |  |  |  |  |  |  |  |  |  | N | Y | Y | Y | CT | 60% |  |  |  |  |  |  |  |  |  |  |  |  |
| Stevens et al, 2015 |  |  |  |  |  |  |  |  |  |  |  |  |  |  |  |  |  |  | CT | CT | Y | CT | Y | 40% |  |  |  |  |  |  |
| Stevens et al, 2015 |  |  |  |  |  |  |  |  |  |  |  |  |  |  |  |  |  |  | CT | CT | Y | CT | Y | 40% |  |  |  |  |  |  |
| Suominen et al, 2015 |  |  |  |  |  |  | Y | N | N | Y | Y | 60% |  |  |  |  |  |  |  |  |  |  |  |  |  |  |  |  |  |  |
| Szanton et al, 2011 |  |  |  |  |  |  | N | Y | Y | Y | CT | 60% |  |  |  |  |  |  |  |  |  |  |  |  |  |  |  |  |  |  |
| Szanton et al, 2011 |  |  |  |  |  |  | CT | Y | Y | Y | CT | 60% |  |  |  |  |  |  |  |  |  |  |  |  |  |  |  |  |  |  |
| Szanton et al, 2015 & 2016 |  |  |  |  |  |  |  |  |  |  |  |  |  |  |  |  |  |  | Y | N | Y | Y | Y | 80% |  |  |  |  |  |  |
| Szanton et al, 2019 |  |  |  |  |  |  | Y | Y | Y | Y | Y | 100% |  |  |  |  |  |  |  |  |  |  |  |  |  |  |  |  |  |  |
| Taylor et al, 2017 | Y | CT | Y | N | CT | 🡪 |  |  |  |  |  |  |  |  |  |  |  |  | Y | N | Y | N | Y | 🡪 | N | Y | N | N | CT | 40% |
| Tohn et al, 2020 |  |  |  |  |  |  |  |  |  |  |  |  | CT | Y | N | CT | Y | 40% |  |  |  |  |  |  |  |  |  |  |  |  |
| Turcotte et al, 2019 |  |  |  |  |  |  |  |  |  |  |  |  |  |  |  |  |  |  | Y | CT | Y | CT | Y | 60% |  |  |  |  |  |  |
| Watkins, Hall & Kring, 2012 |  |  |  |  |  |  |  |  |  |  |  |  |  |  |  |  |  |  | Y | CT | Y | CT | CT | 40% |  |  |  |  |  |  |
| Watkins, Hall & Kring, 2012 |  |  |  |  |  |  |  |  |  |  |  |  |  |  |  |  |  |  | CT | Y | Y | Y | CT | 60% |  |  |  |  |  |  |

# Supplement E. Summary of Results

Supplement E1. Summary of Results of Studies with a Control Group, Organized by Outcome, Study Design and Intervention Type [[1]](#endnote-1)

| **Author, Year** | **Study Design [[2]](#endnote-2) (MMAT Score)** | **Sample Size**  **(I/C) [[3]](#endnote-3)** | **Follow Up Time [[4]](#endnote-4)** | **Outcome (Scale Details)** | **Direct-ion [[5]](#endnote-5)** | **Available Data [[6]](#endnote-6)** | **2 Sided p value [[7]](#endnote-7)** | **Key Author Conclusions** |
| --- | --- | --- | --- | --- | --- | --- | --- | --- |
| Mortality | | | | | | | | |
| Liotta et al, 2018 | RCS (80%) | 6483/5724 | ~1.5 years | Death rate (age specific) | ▲p | - Change in cumulative mortality I: 19.1% vs. C: 71% - 13% reduction in mortality - Regression coefficient =-0.217 | <0.001 | Mitigation of heat related mortality likely the outcome of increased resilience from the program. |
| Function | | | | | | | | |
| Szanton et al, 2019 | RCT (100%) | 152/148 | 5-12 months (ii) | ADLs & IADLS (/16 lower=better) | **△**p  ◁**▷s** | - 5 months ADL I: 2.22(0.26), C: 2.83(0.28) - 5 months IADL I: 3.86(0.35), C: 4.39(0.34) - 12 months ADL I: 2.65(0.30), C: 2.67(0.27) - 12 months IADL I: 4.50(0.41), C: 4.28(0.37) | 0.001*  0.001*  0.5447*  0.001* | Participants randomized to the CAPABLE group reported a substantial reduction in disability scores after treatment. |
| Agulia et al, 2015, 2020 | RCT (80%) | 1146/510 | 6-18 months (i) | Max peak expiratory flow (liters/min) | ▲ | - 6 months Men MD: 4.27(10.88) - 6 months Women MD: 17.44(8.82) - 18 months Men MD: 43.39(8.34) - 18 months Women MD: 38.64(6.33) | 0.69  <0.05  <0.05  <0.05 | Income program effects lasted on lung function. |
| Szanton et al, 2011 | RCT (60%) | 24/16 | 6 months (ii) | ADL & IADL (/6 lower=better)) | **△**p | - ADL I: 0.7(0.8), C: 2.1(2.3) - IADL I: 1.2(1.3), C: 1.8(1.9) | 0.63  0.62 | There are differences in mean change between the intervention, control groups, and baseline to follow up. |
| Crews et al, 2019 | RCT (60%) | 6/6 | 5 months (ii) | ADL & IADLs (Katz score /16) | **△**s | - ADL I: 2.0(3.03), C: 0.7(1.2) - IADL I: 3.8(3.06), C: 3.3(3.2)   Unequal baseline, mean change difference (MCD) favours intervention | 0.509*  0.826* | Participants improved in functioning compared to baseline. |
| Park et al, 2021 | CBA (80%) | 187/196 | 3-30 months (i) | Disability score (/17) | **△** | - 6 months I: 1.08(0.84-1.39), C: 1.60(1.21-2.12) - 12 months I: 1.29(1.03-1.62), C: 1.87(1.74-2.72)   Statistically significant differences until 18 months, favouring intervention. | 0.04  0.03 | The intervention group had numerically lower mean scores by 0.5 until 21 months. |
| Hikichi et al, 2015 & 2017 | CBA (80%) | 246/2175 | 5-7 years (i) | Functional disability (/6) | ▲p | - HR of disability onset: 0.50 (0.32-0.80) | <0.001 | Intervention contributed to prevention of incident functional disability. |
| Harada et al, 2020 | CBA (60%) | 173/489 | 3 years(i) | IADLs (Tokyo Metropolitan Institute of Gerontology) | **△** | - I: 4.9(1.3**), C:4.6(0.0)   After time adjustment, results favoring intervention no longer statistically significant. | 0.015 | No effect was observed for I ADLs score and health related quality of life after adjusting for covariance and time. |
| Spoelstra et al, 2019 | CBA (60%) | 270/1350 | 32 weeks (i) | ADL/IADL scores (MDS-HC) | **△** | - ADL I: 7.80(2.86), C: 7.95(3.35) - IADL I: 5.62(1.09), C: 6.76(1.27) | 0.45  <0.01 | Improvements in function pre to post intervention (and occasionally compared to control). |
| Cognition | | | | | | | | |
| Bae et al, 2019 | RCT (80%) | 41/83 | 6 months (i) | MMSE composite, word memory score, spatial working memory, substitution score | ◁**▷p** | - MMSE MD I: -0.51(-1.35-0.34), C: 0.35(-0.44-1.15) - Composite word memory MD I: 0.71(-0.07-1.48), C: 0.85(0.12-1.58) - Spatial memory MD I: 0.27(-0.07-0.62), C: -0.28(-0.60-0.05) - Trails A MD I: 0.23(-2.16-2.63), C: -1.07(-3.32-1.18) - Trails B MD I: 2.75(-9.67-15.17), C:-0.82(-12.53-10.90) - Symbol digit substitution MD I: -0.5(-2.16-1.17), C: 1.70(0.09-3.2) | 0.434  0.594  0.003  0.455  0.113  0.038 | Intervention improved in spatial working memory only. |
| Agulia et al, 2015, 2020 | RCT (80%) | 1146/510 | 6-18 months (i) | Verbal recall (recall 8 nouns after 5 min) | ▲ | - 6 months Men I: 2.48(0.09), C: 2.69(0.09) - 6 months Men MD I: 0.62(0.07), C: 0.05(0.08) - 6 months Women I: 2.98(0.08), C: 3.20(0.10) - 6 months Women MD I: 0.49(0.06), C: -0.17(0.09) | <0.05  <0.05 | 6 months after introduction of income supplement, improvements in memory recall persisted to 12 months. |
| Hikichi et al, 2015 & 2017 | CBA (80%) | 1,067/13,195 | 5-7 years (i) | Cognitive disability incidence assessed by national insurance program | ▲p | - OR of cognitive disability: 0.72 (0.54-0.98) | 0.04 | Salons may be effective for prevention of cognitive decline. |
| Subjective Health | | | | | | | | |
| Szanton et al, 2011 | RCT (60%) | 24/16 | 6 months (ii) | HRQoL (EuroQoL and EQ-5D) | **△**s | - EuroQoL I: 75.8(15.04), C: 62.5(24.9) - EQ-5D I: 2.9(1.6), C: 3.8(2.2)   Cohen’s D calculated in study EuroQoL: 0.89, EQ-5D: 0.48 | 0.0419*  0.142* | The intervention was acceptable, feasible and showed promising results. |
| Blancofort et al, 2021 | RCT (60%) | 195/195 | 12 weeks –9 months (ii) | Self-perceived health (SF-12, EQ-5D) | ◁**▷p** | - SF-12: MCD I: 5.01(3.21-6.82), C: 3.13(1.71-4.56) - EQ-5D: MCD 1: 4.80(1.09-8.52), C: 2.34(-1.74-6.43) | 0.1*  0.38* | Self-perceived health assessed using the SF-12 was not affected by the intervention. Measured with the EQ-5D, there was significant pre-post improvement in the intervention group. |
| Suominen et al, 2015 | RCT (60%) | 50/49 | 12 months (i) | HRQoL (15-D) | ▲s | - MCD I: 0.006(-0.016-0.028), C: -0.036(-0.059-0.013) | 0.007 | Improvement in intervention group QoL measured using 15-D by 0.04 (0.02-0.03 considered clinically significant). |
| Boen et al, 2012 | RCT (0%) | 77/61 | 12 months (i) | Self-rated health (/4) | **▽** | - I: 2.24(0.72), C: 2.40(0.63) - MCD I: -0.20 (0.74), C:-0.15(0.52) | 0.6554* | No difference in changes in self-rated health between groups after intervention. |
| Harada et al, 2020 | CBA (60%) | 173/489 | 3 years(i) | HRQoL (SF-8) | **△** | - I: 46.9(6.63**), C:48.1(6.58**) - MCD I: 0.6, C: -1.1 | 0.005 | Between group improvements in HRQoL disappear after adjusting for time. |
| Castle et al, 2016 | CBA (40%) | 736/399 | 6 months–3 years (i) | Self-perceived health (SF-12) | ▲ | - I: 46%, C:40% (rated good or better) | <0.05 | Self-rated health improved in the intervention group. |
| Callaghan et al, 2017 | XCS (100%) | 121/121 | n.d | Overall QoL (/5 lower = better) | ▲s | - I: 1.94(0.91), C: 2.18(0.97) | 0.05 | Small but statistically significant difference in overall quality of life. |
| Hospital Utilization | | | | | | | | |
| Blancofort et al, 2021 | RCT (60%) | 195/195 | 12 weeks–9 months (ii) | Visits to ED | **△s** | - MCD I: -0.18(-0.55-0.19), C: 0.31(-0.10-0.72) | 0.0506* | No effect on ED visits. |
| Galbraith et al, 2017 & Balaban et al, 2015 | RCT (40%) | 747/1,190 | 180 days (i) | 30 day hospital readmission & ED rates | **△** | - Hospitalizations I: 0.44(0.35-0.52), C: 0.53(0.44-0.62) - ED visits I: 0.45(0.31-0.58), C: 0.65(0.49-0.81) | 0.14  0.06 | Among patients aged 60 or older, there were non-significant trends towards lower ED and hospitalization rates. |
| Jacobs et al, 2020 | CBA (100%) | 222/234 | 12 months | ED, hospitalizations, | ◁**▷p** | - Hospitalization I: 0.68(0.54-0.85), C: 0.44(0.36-0.54) - ED visits I: 0.27(0.22-0.35), C:0.28(0.23-0.34) | 0.005  0.87 | Intervention group more likely to use the hospital than control group (although frailer at baseline). |
| Spoelstra et al, 2019 | CBA (60%) | 270/1350 | 32 weeks (i) | # ED visits, hospitalizations | ◁**▷** | - Hospitalization I: 0.23(0.60), C: 0.47(2.66) - ED visits I: 027(0.65), C: 0.27(0.81) | <0.01  0.94 | Fewer hospitalizations in intervention group. |
| Castle et al, 2016 | CBA (40%) | 736/399 |  | ED visits and unplanned hospitalizations | ▲ | - ED I: 0.15%, C: 0.36% - Hospitalization I: 0.17%, C: 0.35% | <0.001  <0.001 | Significantly less unplanned ED visits and hospitalizations in intervention group. |
| Tohn et al, 2020 | CBA (40%) | 49/35 |  | Hospital visit or hospital transport due to falls | **△** | - Hospital visit I: 13% at baseline and 3% at follow up - Hospital admission I: 6% at baseline and 0% at follow up | Not calculable | For hospital admission and hospital transport, no within group differences. |
| Evans et al, 2021 | RCS (100%) | 45,522/127,443 | 7-90 days (i) | Readmission | ▲ | - 7 days CE: -0.0.192(SE0.00808) - 30 days CE: -0.032 (SE0.0159) - 90 days CE: -0.0479(SE0.0203) | 0.017  0.039  0.018 | Significant reductions in admission rates. |
| Gusmano et al, 2018 | RCS (60%) | 1248/15947 |  | Discharge rate, length of stay (LOS) | ▲ | - Discharge rate I: 88.1, C:129.4 - LOS I: 6.38(5.00), C:7.38(9.23) | <0.01  <0.05 | Residents in the program had lower rates of hospital discharges overall and shorter hospital lengths of stay compared to the control. |
| Other Healthcare Utilization (primary care visits to physician or nurse) | | | | | | | | |
| Agulia et al, 2015, 2020 | RCT (80%) | 1146/510 | 6-18 months (i) | Number of doctor visits | **▽s** | - 6 months Men MD: 0.12(0.14) - 6 months Women MD: 0.35(0.20) - 18 months Men MD: 0.34(0.14) - 18 months Women MD: 0.28(0.11) | 0.40  0.08  0.02  0.02 | Increased for females in number of doctor visits in intervention group for women, but the same increases were not always seen for men. |
| Blancofort et al, 2021 | RCT (60%) | 195/195 | 12 weeks –9 months (ii) | Visits to doctor (general practitioner (GP) or nurse (RN)) | ◁**▷s** | - GP: MCD I: -0.36(-1.27-0.54), C: -0.12(-1.13-0.89) - RN: MCD I: 1.72(0.43-3.02), C: -0.19(-1.64-1.26) | 0.054*  0.728* | No difference in change to GP visits. There was an increase in visits to nurses in intervention group, although it was significantly lower at baseline and reached the same level as the control group at baseline. |
| Galbraith et al, 2017 & Balaban et al, 2015 | RCT (40%) | 747/1,190 | 180 days (i) | Outpatient visits to primary care physicians | ◁**▷** | - Outpatient visits I: 7.62(6.97-8.27), C: 7.63(6.98-8.27) | 0.99 | No differences in outpatient visits to primary care providers. |
| Castle et al, 2016 | CBA (40%) | 736/399 | 6months –3 years (i) | Doctor, RN visits | ▼ | - Doctor I: 2.92, C: 2.66 - RN I: 5.1, C: 2.95 | <0.001  <0.01 | Higher doctor and nurse visits in intervention group. |

1. Intervention Type: the social determinant of health most targeted by the intervention. Pink = social and community, Green = neighborhood and built environment, Purple = navigation of health and social services, Orange = economic stability, Blue = specific intervention (CAPABLE), Grey = Education. [↑](#endnote-ref-1)
2. Study design: RCT = randomized controlled trial (includes cluster, parallel and waitlist), CBA = controlled before & after study, RCS = retrospective controlled study, XCS = cross-sectional controlled study. [↑](#endnote-ref-2)
3. I = intervention group, C = control group. [↑](#endnote-ref-3)
4. Follow up: (i) time from start of intervention, (ii) time from end of intervention, n.a. = not applicable, n.d = not described. [↑](#endnote-ref-4)
5. Effect direction: upward arrow (**△**▲) = positive health impact or reduction in health service use, downward arrow (**▽**▼) = negative health impact or increase in health service use, sideways arrow (◁►or ◄**▷**) = mixed effects/conflicting findings.

   Acronyms: ADL = activities of daily living, ED = emergency department, HRQoL = health related quality of life, IADL = instrumental activities of daily living, MDS-HC = minimum data set – health care, MMSE = Mini Mental State Examination, SF = short form [health survey]. [↑](#endnote-ref-5)
6. Available data:

   Unless otherwise specified, data presented as mean score/frequency (standard deviation) at follow up in the intervention group (I) and the control group (C). For studies with insufficient data, the result type is specified.

   - ** = standard deviation calculated as per Chapter 6.5 in the Cochrane Handbook (Higgins JPT, Li T, Deeks JJ (editors). Chapter 6: Choosing effect measures and computing estimates of effect. In: Higgins JPT, Thomas J, Chandler J, Cumpston M, Li T, Page MJ, Welch VA (editors). *Cochrane Handbook for Systematic Reviews of Interventions*version 6.2 (updated February 2021). Cochrane, 2021. Available from [www.training.cochrane.org/handbook](http://www.training.cochrane.org/handbook)).
   - Acronyms: CE = regression coefficient, MCD = mean change difference (within group change from baseline to follow up), MD = mean difference between intervention and control groups at follow up, OR = odds ratio, SE = standard error.

   [↑](#endnote-ref-6)
7. * = p value calculated using unpaired t-test of follow up means between groups because no p value reported in study.

   Supplement E2. Summary of Results on Studies without Control Group, Organized by Outcome, Study Design and Intervention Type

   | **Author, Year** | **Study Design (MMAT Score)** | **Sample** | **Follow Up Time** | **Outcome (Scale Details)** | **Direction** | **Available Data** | **Key Author Conclusions** |
   | --- | --- | --- | --- | --- | --- | --- | --- |
   | Function | | | | | | | |
   | Szanton et al, 2015 & 2016 | UBA (80%) | 281 | 5 months (i) | ADL & IADLs (/16) (lower = better) | **△** | ADL T0: 3.9(3.04), T1: 2.0 (2.0)  IADL T0: 4.1(2.09), T1: (2.9 SD 2.22) | 75% of participants had reduction in ADLs and 65% of participants had reduction in IADLs. The practical effects of improving from 4 to 2 difficulties with ADLs can be life-changing. |
   | Scharlach et al, 2015 | UBA (80%) | 26 | 6 months (i) | ADLs (/4) (lower = better) | **▽** | T0: 2.33(0.91), T1: 2.57(0.87), p=0.16 | Neither self-rated health nor functional limitation changed significantly. |
   | Cognition | | | | | | | |
   | Chiang et al, 2018 | XUS (60%) | 417 | n.a. | Self-report memory improvement | **△** | 45.8% of the participants reported improved memory. This outcome was related to better baseline cognitive function, better mental health and higher participation frequency. | There were positive health outcomes of participating in the intervention (improvements in self rated health, sleep quality, memory, family relationships, care for health and health literacy). |
   | Stevens et al, 2015 | UBA (40%) | 149 | 12 months (i) | MMSE | **△** | T1: 18.5(7.9), T1: 18.7(9.1), p=0.68 | No significant differences in clinical outcomes. |
   | Molina-Luque et al, 2018 | Q (20%) | 6 | 4 years | Interviews | **△** | “The six senior students interviewed for this study, aged 58 to 62, have claimed that their new role as students of this program not only kept them busy and fostered their cognitive skills but also increased their social relationships.” | |
   | Subjective Health | | | | | | | |
   | Chapin et al, 2013 | UBA (80%) | 40 | 90 days (ii) | QoL Index (overall/health/function) | **△** | T0: 16.61(5.64), T1: 19.42(5.76), p<0.01 | Results show that the intervention has potential for reducing depression and increasing health related quality of life in low income older adults with physical health conditions. |
   | Daban et al, 2021 | UBA (80%) | 147 | 6 months (i) | Self-rated health (/5) | ▲ | Participated 9-24 times, self-rated health good T0: 51.6%, T1: 77.4%  Participated >24 times, T0: 35.7%, T1: 67.9% | Improvements in patient self rated health, mental health, and reductions of anxiety. Frequency of participation is also associated with good self-rated health. |
   | Scharlach et al, 2015 | UBA (80%) | 26 | 6 months (i) | Self-rated health (/5 poor to excellent) | **△** | Self rated health good to excellent T0: 38%, T1: 48%, p=0.63 | Non-significant changes but model of care coordination is promising, especially for low and moderate income adults. |
   | Jo et al, 2018 | MM/UBA (80%) | 79 | 8-11 weeks | Self-perceived health (SF-36, physical components) | **△** | Physical functioning T0: 77.1(18.8), T1: 78.9(18.9), p=0.089  Role-Physical T0: 69.8(23.7), T1: 71.4(22.2), p=0.250  Bodily pain T0: 74.0(23.4), 78.2(18.7), p=0.014  General health T0: 62.6(21.5), T1: 61.9(19.8), p=0.306 | Overall, the CESC program encouraged Korean senior participants to live actively and help them feel physically and emotionally stronger, while reducing social isolation. |
   | Coll-Planas et al, 2017 | UBA (60%) | 36 | 15 weeks | Self-perceived health (SF-12) | **△s** | T0: 3.74(0.72), T1: 3.94(0.89), p=0.16 | These findings are consistent with other intervention study effects: improvements in social wellbeing are generally achieved but rarely in physical health. |
   | Turcotte et al, 2019 | UBA (60%) | 93 | 12 months (i) | Self-rated health | ▲ | Fair to very good health T0: 66.3%, T1: 80.3%, p<0.05 | Significant increase in participants reporting fair to very good health. |
   | Stevens et al, 2015 | UBA (40%) | 149 | 12 months (i) | Self-rated health (/5) | **△** | T0: 3.7(1.1), T1: 3.8(0.9), p=0.23 | Non-significant change in self rated health. |
   | Watkins et al, 2012 | UBA (40%) | 292 | 30 days-4 months (ii) | QoL (SF-36, physical health summary score) | ▲ | T0: 25.79, T1: 30.89 (p<0.001) | The results of the study show the importance of extending social support and health education into the home after discharge from the hospital to improve physical health. |
   | Herity et al, 2018 | RU (60%) | 191 | 6-24 months (i) | Self perceived health (poor-excellent/5) | ▲p | Good to excellent health T0: 55.5%, T6months: 59.7%, T24months: 68%, p=0.03 | This unique model of care optimizes medication management while addressing social determinants of health. |
   | Chiang et al, 2018 | XUS (60%) | 417 | n.a. | Self-rated health (same, worse, better) | **△** | 85.9% of the participants reported better health after participation. | There were positive health outcomes of participating in the intervention (improvements in self rated health, sleep quality, memory, family relationships, care for health and health literacy). |
   | Taylor et al, 2018 | MM / XUS (40%) | 143 | n.a. | Self-assessed health (SF-8) | **▽**p | % participants with positive change: 18.0  % participants with negative change: 58.6  p=0.211 | There was no change in overall self assessed health of men's shedders before compared with after joining men's shed. |
   | Hospital Utilization | | | | | | | |
   | Prior et al, 2012 | UBA (80%) | 193 | 24 months (ii) | Monthly ED visits, hospitalizations | ▲ | Median ED visits T0: 0.17, T1: 0.11, p=0.007  Median Hospitalizations T0: 0.21, T1: 0.13, p =0.02 | Positive outcomes for the program, as well as decreasing emergency department visits and hospital admissions. |
   | Scharlach et al, 2015 | UBA (80%) | 26 | 6 months (i) | ED visits or hospital stays | **△** | T0: 38%, T1: 24%, p=0.65 | While participants were more likely to report obtaining medical care, ED and hospital visits did not change significantly. |
   | Coll-Planas et al, 2017 | UBA (60%) | 36 | 15 weeks | ED hospitalizations | ☐s | “No significant change was seen in visits to the ED or in hospitalization (results not shown)” | |
   | Turcotte et al, 2019 | UBA (60%) | 93 | 12 months (i) | Ed visit, hospitalizations | **△** | ED T0: 0.69, T1: 0.35, p>0.05  Hospitalizations T0: 0.38, T1: 0.21, p>0.05 | At the one-year follow-up the means for all measures of healthcare use were reduced compared to baseline. |
   | Stevens et al, 2015 | UBA (40%) | 149 | 12 months (i) | ED visit, hospital stay, total nights in hospital | ▲ | ED T0: 1.4(1.6), T1: 0.3(0.7), p<0.001  Hospital stay T0: 0.9(1.2), T1: 0.4(1.0), p<0.001  Nights in hospital T0: 5.1(8.6), T1: 0.8(2.2), p<0.001 | Although not shown here, caregivers experienced equally significant improvements in all hospital or healthcare use outcomes, suggesting increased care for older adults did not come at the expense of their caregivers. |
   | Watkins et al, 2012 | UBA (40%) | 292 | 30 days-4 months (ii) | Readmission | **△** | “22% of participants required hospital readmission for any cause. The hospital readmission rate of county residents age 65 older in 2007 was 57%. This represents a 61% reduction in hospital readmissions.” | Access to immediate in-home care services such as transportation, housekeeping, laundry, and light meal preparation allows patients to avoid gaps in care that could result in a readmission. |
   | Herity et al, 2018 | RU (60%) | 191 | 6-24 months (i) | Self-report ED or hospital admissions | **△**p | ED T0: 0.83(1.2), T6months: 0.60(1.1), T24months: 0.53(1.1), p=0.002  Hospital admission T0: 0.56(1.0), T6months: 0.42(0.9), T24months: 0.4(1.1), p=0.02 | These findings reinforce the original program outcome evaluation that showed a decrease in percent of participants recording an ED visit and hospital admission in the previous year. |
   | Other Healthcare Utilization (primary care visits to physician or nurse) | | | | | | | |
   | Coll-Planas et al, 2017 | UBA (60%) | 36 | 15 weeks | Physician, nursing visits | **▽s** | General practitioner visits T0: 10.51(7.88), T1: 10.97(5.72), p=0.59  Nurse visits T0: 6.65(7.71), T1: 10.42(11.24), p=0.005 | No effect found other than a significant increase in visits to the nurse. This could be explained by the nurse’s role in the group, which could’ve increased participants’ trust. |
   | Turcotte et al, 2019 | UBA (60%) | 93 | 12 months (i) | Physician visits | ▲ | T0: 0.69, T1: 0.34, p<0.05 | At the one-year follow-up the means for all measures of healthcare use were reduced compared to baseline. |
   | Stevens et al, 2015 | UBA (60%) | 149 | 12 months (i) | Physician visits | ▲ | T0: 7.3(6.3), T1: 4.1(4.9), p<0.001 | Although not shown here, caregivers experienced equally significant improvements in all hospital or healthcare use outcomes, suggesting increased care for older adults did not come at the expense of their caregivers. |

   Intervention Type: the social determinant of health most targeted by the intervention. Pink = social and community, Green = neighbourhood and built environment, Purple = navigation of health and social services, Orange = economic stability, Blue = specific intervention (CAPABLE), Grey = Education.

   Study design: UBA = uncontrolled before after study, RU = retrospective uncontrolled study, XUS = cross sectional uncontrolled study, Q = qualitative.

   Follow up: (i) time from start of intervention, (ii) time from end of intervention, n.a. = not applicable, n.d = not described.

   Effect direction: upward arrow (**△**▲) = positive health impact or reduction in health service use, downward arrow (**▽**▼) = negative health impact or increase in health service use, sideways arrow (◁►or ◄**▷**) = mixed effects/conflicting findings.

   Acronyms: ADL = activities of daily living, ED = emergency department, HRQoL = health related quality of life, IADL = instrumental activities of daily living.

   Unless otherwise specified, data presented as within group mean score/frequency (standard deviation) at T0 (baseline) and T1 (follow up time specified in named column).

   Supplement E3. Second reviewer’s audit of 9 randomly chosen studies including results and data synthesis

   | **Reference** | **Study Design** | **Sample Size (I/C)** | **Follow up Time** | **Outcome Scale** | **Direction of Effect** | **Available Data** | **2-sided p value** | **Key Author Conclusions** |
   | --- | --- | --- | --- | --- | --- | --- | --- | --- |
   | Turcotte at al, 2019 | UBA | 93/0 | 12 months | Self-rated health | Positive | Fair to very good health T0: 66.3%, T1: 80.3%, p<0.05 | NA | Significant increase in participants reporting fair to very good health. |
   | Hospital visit and stays | Positive | ED visits, mean change T1-T0 = 0.21, p>0.05  MD visits, mean change T1-T0 = -0.48 (0.14, 0.85), p<0.05  Hospitalization mean change T1-T0 = 0.34 | NA | A significant reduction in healthcare utilization for Dr visits and significant improvements |
   | Stevens et al, 2015 | UBA | 149 | 12 months | Self Rated Health (/5) | Positive | Baseline mean = 3.7(1.1SD)  T12 mean = 3.8(0.9SD)  p=0.23 | NA | In conclusion, a program that combined CG support, specific health coaching at the critical time of transition from hospital to home, and limited amount of formal home care services appeared to have numerous positive benefits on the health and well-being of CRs and CGs. CRs had fewer physician visits, ED visits, hospital stays and total nights in hospital at 12 month assessment compared to baseline. |
   | MMSE | Positive | Baseline mean = 18.5(7.9SD)  T12 = 18.7(9.1SD)  p=0.68 | NA |
   | Physician visit, ED visit, Hospital stay, Total nights in hospital | Positive | Table 3  All measures decreased & stat sig p<0.001 | NA |
   | Herity et al, 2018 | RU | 191 | 18 months | Self-perceived health (/5) | Positive | Table 3, p=0.03, percentage of people who perceived health as good to excellent. | NA | Participants enrolled in these services experienced significant reductions in mean number of reported hospital admissions and ED visits. Our findings suggest that community-based programs that combine medication access and management with services to address basic needs should be further explored for their potential  role in reducing hospital use of older adults |
   | Self-reported ED or hospital admissions | Positive | Significant declines in percent of participants who had ED visits in the past year. Non sig decline in percent of participants who had hospital admissions. Means for both decreased and were stat sig. | NA |
   | Watkins, Hall & Kring, 2012 | UBA | 292 | 1 to 4 months | QoL (SF-36) | Positive | Physical health T0=25.79, T1 = 30.89 (p<0.001) | NA | The results of this study demonstrate the importance of extending social support and health education into the home after discharge from the hospital. Access to immediate in-home care services such as transportation, housekeeping, laundry, and light meal preparation allows patients not to experience gaps in care that could result in a readmission. |
   | Readmission | Positive | Approximately 22% of participants required hospital readmission for any cause. The hospital readmission rate of county residents age 65 older in 2007 was 57%. This represents a 61% reduction in hospital readmissions. | NA |
   | Boen et al, 2012 | RCT | 77/61 | 12 months | Self-rated health (/4) | Negative | I: T1-T0 = -0.20(0.74SD)  C:T1-T0 = -0.15(0.52SD)  p = 0.07 | 0.66 | In all probability, the intervention failed to meet optimistic targets, but possibly met quite modest ones. Since intention-to-treat analysis was not possible, we do not know the effect on the intervention group as a whole. A further evaluation of these programmes is necessary to expand the group programme. For the depressed, more specialized programmes to cope with depression may be a more appropriate intervention |
   | Liotta et al, 2018 | RCS | 12207(6483/5724) | June 2014 to December 2016 | Mortality | Positive | 13% reduction in mortality, 25 deaths adverted, B=-0.217, p<0.001 | <0.001 | the paper shows the impact of a community-based active monitoring program, focused on strengthening individual relationship networks and the social capital of the community, on mortality in those over 75 during  heat waves. |
   | Jacobs et al, 2020 | CBA | 456(222/234) | 12 months | Hospitalization, ED visits | Negative and the same | Higher hospitalization in P2P group (RR1.54, p=0.005) and no other differences in remaining outcomes | 0.005, 0.87 | P2P support was associated with higher rates of hospitalization  but was not associated with other measures of health care utilization. |
   | Szanton et al, 2011 | RCT | 24/16 | 6 months | ADL, IADL | Positive | Diff 1.4(ADL C-I)  Diff 0.62(IADL C-I) | 0.63  0.62 | The CAPABLE intervention was acceptable to participants and feasible to provide and showed  promising results, suggesting that this multicomponent intervention to reduce disability should be evaluated in a larger trial. |
   |  | EuroQoL, EQ-5D | Positive | I: 75.8 (15.04), C: 62.5(24.9) (EuroQol)  I: 2.9(1.6), C: 3.8(2.2) (EQ-5D) | 0.0419 (EuroQoL)  0.142(EQ-5D) |
   | Bae et al, 2019 | RCT | 83 (41/42) | 24 weeks | MMSE, composite, word memory score, spatial working memory, substitution score | Positive for one out of six only | The intervention group revealed significantly greater improvements in special working memory [P equals 0.024] following intervention compared with the control group. However in the remaining 5 tests (word memory, trails and processing speed) showed no significant between group differences. | 0.434 (MMSE)  0.594 (composite)  0.003 (word score)  0.455 (spatial)  0.113 (working)  0.038 (substitution) | This study showed that a 24-week multicomponent intervention program was effective in improving  spatial working memory and maintaining physical activity in older adults with MCI. A follow-up investigation  is required to determine whether continuation of physical, cognitive, and social activity can prevent  dementia or reverse MCI in older adults. |
   | Evans et al, 2012 | RCS | 45,522/127,443 | NR | MMSE (/30) | Positive | 30,60,90day readmission rates. 14% or more reduction of sample mean | 0.018 (30 days)  0.039 (60 days)  0.018 (90 days) | This analysis offers encouraging news for CCTP in general, and the CSCTC model in particular.  We find that the CSCTC program reduced 30-day readmissions by about 17 percent. |

   [↑](#endnote-ref-7)
